# Supplementary material
Source: MDPI journal article supplement (https://www.mdpi.com/2073-4395/11/5/1013)
Supplement: s1 [file s1]

Table S1. Field sites and soil properties of the six experiments

| Variant                     | 2019                        |                            |                               | 2020                    |                        |                          |
|-----------------------------|-----------------------------|----------------------------|-------------------------------|-------------------------|------------------------|--------------------------|
|                             | Site 1                      | Site 2                     | Site 3                        | Site 4                  | Site 5                 | Site 6                   |
| Location                    | 49.26491,<br>-0.87763       | 49.512660,<br>0.409829     | 48.851115,<br>0.023732        | 49.249615,<br>-0.612199 | 48.829081,<br>1.230917 | 48.865838,<br>0.021099   |
| Previous crop               | <i>Beta vulgaris</i>        | <i>Linum usitatissimum</i> | <i>Medicago sativa</i>        | <i>Beta vulgaris</i>    | <i>Brassica napus</i>  | <i>Brassica napus</i>    |
| Wheat cultivar              | Sacramento                  | Libravo                    | Chevignon                     | Adoration               | Boregar                | Extase                   |
| Sowing date                 | 17-11-2018                  | 16-10-2018                 | 16-10-2018                    | 28-12-2019              | 10-10-2019             | 25-10-2019               |
| Organic matter input        | Yes                         | No                         | No                            | No                      | No                     | No                       |
| Soil type                   | Clay loams / Frank<br>loams | Deep silt                  | Superficial clay<br>limestone | Deep silt               | Deep silt              | Medium limestone<br>clay |
| pH (water)                  | 6.2                         | 7.3                        | 8.4                           | 6.9                     | 7.4                    | 8.1                      |
| CEC (mol kg <sup>-1</sup> ) | 9.5                         | 8.5                        | 10.8                          | 8.1                     | 13.6                   | 13.2                     |
| Organic matter (%)          | 2.4                         | 2.1                        | 3.4                           | 1.6                     | 2.4                    | 4.1                      |
| C/N Ratio                   | Not determined              | 8.1                        | 7.6                           | 10.4                    | 13.9                   | 8.8                      |
| Total N (%)                 | Not determined              | 0.15                       | 0.26                          | 0.09                    | 0.10                   | 0.27                     |
| Organic C (%)               | 1.42                        | 1.22                       | 1.98                          | 0.94                    | 1.39                   | 2.38                     |
| Assimilable P (ppm)         | 132                         | 101                        | 62                            | 88                      | 50                     | 89                       |
| Exchangeable K (ppm)        | 168                         | 238                        | 254                           | 215                     | 130                    | 337                      |
| Exchangeable Mg<br>(ppm)    | 104                         | 99                         | 216                           | 72                      | 100                    | 151                      |

---

|                |     |     |      |     |     |      |
|----------------|-----|-----|------|-----|-----|------|
| <b>CaO (%)</b> | 2.1 | 3.6 | 12.3 | 1.6 | 3.6 | 13.8 |
|----------------|-----|-----|------|-----|-----|------|

---

**Table S2.** Management of N fertilizer inputs for the six field experiments

| Variant                                                                            | 2019         |              |              | 2020              |                  |                   |
|------------------------------------------------------------------------------------|--------------|--------------|--------------|-------------------|------------------|-------------------|
|                                                                                    | Site 1       | Site 2       | Site 3       | Site 4            | Site 5           | Site 6            |
| <b>Humus effect</b>                                                                | 65           | 50           | 30           | 40                | 35               | 25                |
| <b>Previous crop effect</b>                                                        | 20           | 0            | 40           | 20                | 20               | 20                |
| <b>Organic matter supply effect</b>                                                | 12           | 0            | 0            | 0                 | 0                | 0                 |
| <b>N uptake</b>                                                                    | 10           | 29           | 26           | 0                 | 15               | 20                |
| <b>N residue</b><br><b>(NO<sub>3</sub><sup>-</sup>/NH<sub>4</sub><sup>+</sup>)</b> | 33<br>(25/8) | 35<br>(33/2) | 42<br>(34/8) | 30<br>(26/4)      | 39<br>(28/11)    | 24<br>(21/3)      |
| <b>Total N soil supply (kg N ha<sup>-1</sup>)</b>                                  | 140          | 114          | 138          | 90                | 109              | 89                |
| <b>Crop needs</b>                                                                  | 272          | 304          | 270          | 285               | 234              | 288               |
| <b>N remaining</b>                                                                 | 20           | 20           | 20           | 20                | 15               | 20                |
| <b>Total needs</b>                                                                 | 292          | 324          | 290          | 305               | 249              | 308               |
| <b>N fertilizer input</b>                                                          | 152          | 210          | 152          | 215 - 40<br>= 175 | 132 - 40<br>= 92 | 219 - 40<br>= 179 |
| <b>Supply 1</b>                                                                    | 61           | 100          | 62           | 40 + 77           | 60               | 106               |
| <b>Supply 2</b>                                                                    | 31           | 50           | 30           | 18                | 0                | 13                |
| <b>Supply 3</b>                                                                    | 60           | 60           | 60           | 40                | 40               | 60                |

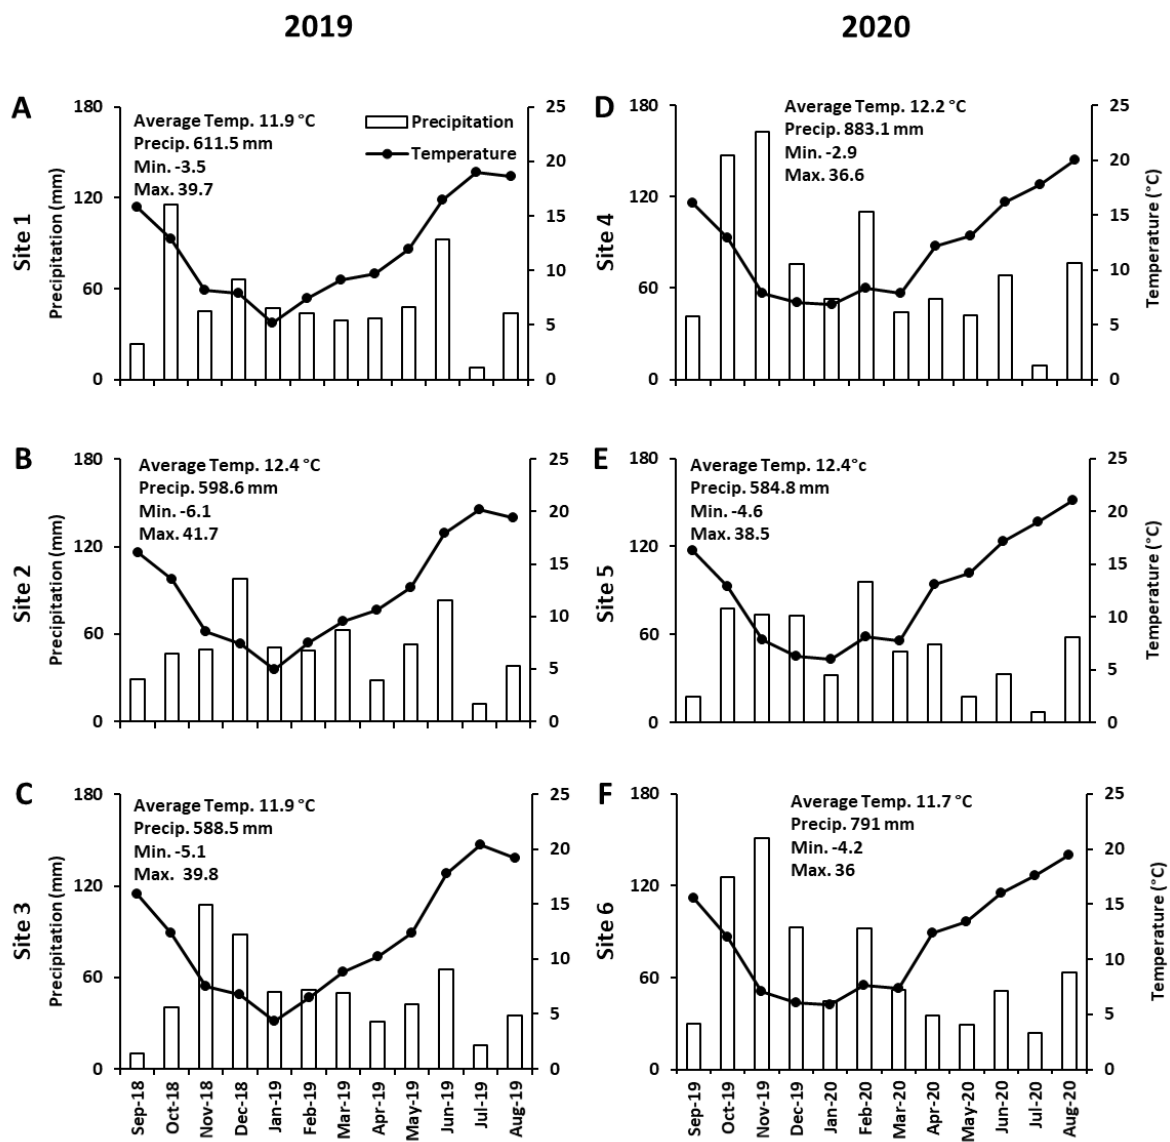

**Figure S1.** Weather conditions for each site during the growing period. (A) Site 1, (B) Site 2, (C) Site 3, (D) Site 4, (E) Site 5 and (F) Site 6.

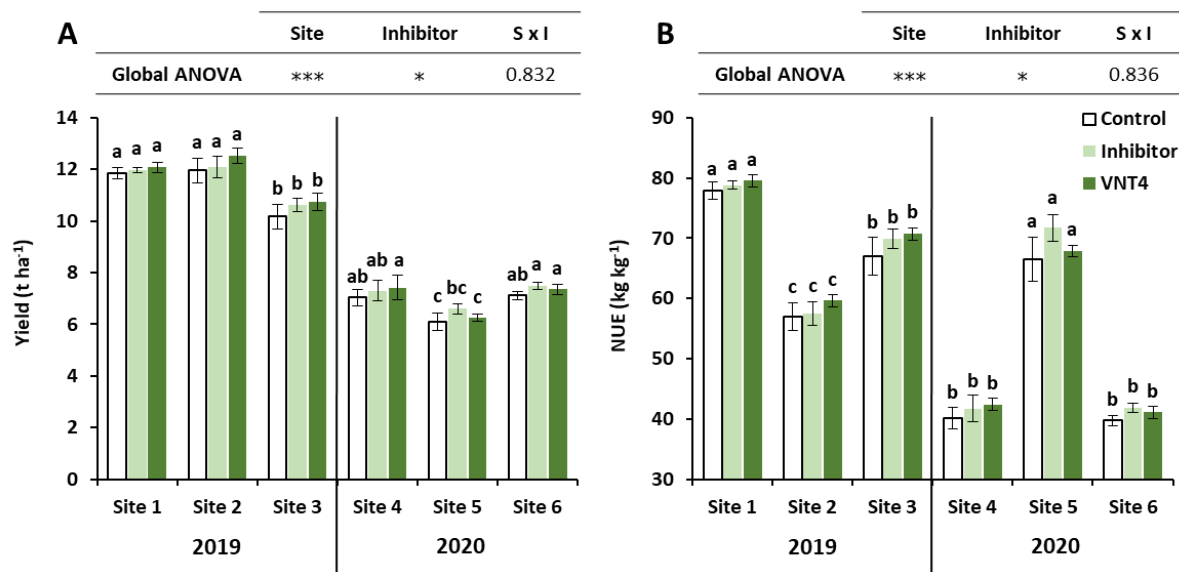

**Figure S2.** Influence of a urease inhibitor (NBPT) and VNT4 on (A) yield and (B) N use efficiency (NUE) in winter wheat under different site and year conditions. Plant culture was carried out under six different field conditions in France, Normandy. N was provided at the tillering, stem elongation and flag leaf stages. NBPT was mixed at a concentration of 0.2% in UAN at each N application (2 mL NBPT for 1 L of UAN). The VNT4 formulation (5 L ha<sup>-1</sup>, see Table 1 for more details) was mixed with UAN before each N application, leading to a global application of 15 L ha<sup>-1</sup>. Bars indicate means  $\pm$  SE. Different letters denote significant differences in 2019 or 2020 according to Fisher's test ( $p < 0.05$ ;  $n = 3$  in 2019,  $n = 4$  in 2020).
